# Supplementary material for: Spatial Dispersal of Epstein–Barr Virus in South America Reveals an African American Variant in Brazilian Lymphomas
Source: MDPI journal article supplement (doi:10.3390/v14081762), 2022-08-12
Supplement: s1 [file s1]

**Table S1 – Phylogenetic classification of population investigated**

| <b>LMP-1 clade</b> | <b>N (%)</b> | <b>Support (aLRT)</b> |
|--------------------|--------------|-----------------------|
| Mediterranean      | 33 (40.2)    | 0.84                  |
| Raji/Argentina     | 32 (39.0)    | 0.99                  |
| B95-8              | 5 (6.1)      | 0.94                  |
| China2             | 1 (1.2)      | 0.98                  |
| Not classified     | 11 (13.4)    | NA                    |

LMP-1: latent membrane protein 1; N: number of sequences; aLRT: Average Likelihood Ratio test; NA: Not available.

**Table S2 – Relationship of LMP-1 clades and clinical outcomes**

| <b>LMP-1 clade</b> | <b>Clinical outcomes</b> |                    | <b><i>p</i> - value</b> |
|--------------------|--------------------------|--------------------|-------------------------|
|                    | <b>ABC<br/>N=49</b>      | <b>MC<br/>N=33</b> |                         |
| Mediterranean      | 23 (46.9)                | 10 (30.3)          | 0.3                     |
| Raji/Argentina     | 16 (32.7)                | 16 (48.5)          |                         |
| B95-8              | 2 (4.1)                  | 3 (9.1)            |                         |
| China2             | 1 (2.0)                  | 0 (0.0)            |                         |
| Not classified     | 7 (14.3)                 | 4 (12.1)           |                         |

LMP-1: latent membrane protein 1; N: number of sequences; ABC: Asymptomatic and benign cases; MC: malignant cases.

Table S3 – Characterization of EBV polymorphisms in the population investigated

| Isolate | LMP-1               |                          |             |                   |             |                           |       |                 |        |    |
|---------|---------------------|--------------------------|-------------|-------------------|-------------|---------------------------|-------|-----------------|--------|----|
|         | N-terminus          | Transmembrane            |             |                   | C-terminus  |                           |       | variant (clade) | EBNA3C | Zp |
|         | <i>Xho</i> I ctcgag | position 169055<br>(C>T) | I124V/I152L | F144I/D150A/L151I | n°<br>rep33 | ins15<br>(which<br>rep33) | del30 |                 |        |    |
| ACBR01  | wt                  | wt                       | I124V/I152L | wt/wt/L151I       | 6           | yes (4°)                  | del30 | Raji/Argentine  | Type 1 | NA |
| ACBR02  | wt                  | wt                       | wt/wt       | wt/wt/L151I       | 4           | no                        | wt    | Raji/Argentine  | Type 1 | V1 |
| ACBR03  | wt                  | wt                       | I124V/I152L | wt/wt/L151I       | 5           | yes (4°)                  | del30 | Raji/Argentine  | Type 2 | V3 |
| ACBR04  | wt                  | wt                       | wt/wt       | wt/wt/L151I       | 3           | no                        | wt    | Mediterranean   | Type 1 | V1 |
| ACBR05  | wt                  | C>T                      | wt/wt       | F144I/D150A/L151I | 5           | no                        | del30 | No classified   | Type 2 | V3 |
| ACBR06  | wt                  | wt                       | wt/wt       | wt/wt/wt          | 3           | no                        | wt    | Mediterranean   | Type 1 | NA |
| ACBR07  | wt                  | wt                       | wt/wt       | wt/wt/wt          | 4           | yes (3°)                  | wt    | B95-8           | Type 1 | V1 |
| ACBR08  | wt                  | wt                       | wt/wt       | wt/wt/wt          | 4           | no                        | wt    | Mediterranean   | Type 1 | V1 |
| ACBR09  | wt                  | wt                       | I124V/I152L | wt/wt/L151I       | 5           | yes (4°)                  | del30 | Raji/Argentine  | Type 1 | NA |
| ACBR10  | wt                  | wt                       | wt/wt       | wt/wt/wt          | 5           | no                        | del69 | Mediterranean   | Type 1 | NA |
| ACBR11  | wt                  | wt                       | wt/wt       | wt/wt/L151I       | 4           | yes (3°)                  | wt    | Raji/Argentine  | Type 1 | NA |
| ACBR12  | wt                  | wt                       | wt/wt       | wt/wt/wt          | 7           | no                        | del30 | No classified   | Type 1 | V1 |
| ACBR13  | wt                  | C>T                      | wt/wt       | F144I/D150A/L151I | 5           | no                        | del30 | No classified   | Type 2 | V3 |
| ACBR14  | wt                  | wt                       | I124V/I152L | wt/wt/L151I       | 5           | yes (4°)                  | del30 | Raji/Argentine  | Type 1 | V1 |
| ACBR15  | wt                  | wt                       | I124V/I152L | wt/wt/L151I       | 5           | yes (4°)                  | del30 | Raji/Argentine  | Type 1 | V1 |
| ACBR16  | wt                  | wt                       | I124V/I152L | wt/wt/L151I       | 4           | yes (3°)                  | wt    | Raji/Argentine  | Type 1 | V1 |
| ACBR17  | wt                  | wt                       | wt/wt       | wt/wt/L151I       | 4           | no                        | wt    | Mediterranean   | Type 1 | V1 |
| ACBR18  | wt                  | wt                       | wt/wt       | wt/wt/L151I       | 4           | no                        | wt    | Mediterranean   | Type 1 | NA |
| ACBR19  | wt                  | wt                       | I124V/I152L | wt/wt/L151I       | 5           | yes (4°)                  | del30 | Raji/Argentine  | Type 1 | NA |

|         |        |     |             |                   |   |          |       |                |        |    |
|---------|--------|-----|-------------|-------------------|---|----------|-------|----------------|--------|----|
| ACBR20  | wt     | wt  | wt/wt       | wt/wt/wt          | 8 | no       | del30 | Mediterranean  | Type 1 | NA |
| ACBR21  | wt     | wt  | wt/wt       | wt/wt/wt          | 4 | no       | del30 | No classified  | Type 1 | NA |
| ACBR22  | wt     | wt  | I124V/I152L | wt/wt/L151I       | 5 | yes (4°) | del30 | Raji/Argentine | Type 2 | V3 |
| ACBR23  | wt     | wt  | wt/wt       | wt/wt/wt          | 6 | no       | wt    | Mediterranean  | Type 1 | V1 |
| ACBR24  | wt     | wt  | I124V/I152L | wt/wt/L151I       | 5 | yes (4°) | del30 | Raji/Argentine | Type 1 | V3 |
| ACBR25  | wt     | wt  | wt/wt       | wt/wt/wt          | 5 | no       | wt    | Mediterranean  | Type 2 | V3 |
| ACBR26  | wt     | wt  | wt/wt       | wt/wt/wt          | 6 | no       | wt    | Mediterranean  | Type 1 | V1 |
| ACBR27  | wt     | wt  | wt/wt       | wt/wt/wt          | 1 | no       | del69 | Mediterranean  | Type 2 | V3 |
| ACBR28  | wt     | wt  | I124V/I152L | wt/wt/L151I       | 5 | yes (4°) | del30 | Raji/Argentine | Type 1 | V1 |
| ACBR29  | wt     | wt  | wt/wt       | wt/wt/wt          | 5 | no       | del69 | Mediterranean  | Type 2 | V3 |
| ACBR30  | CTCTAG | wt  | wt/wt       | F144I/wt/L151I    | 5 | no       | wt    | China2         | Type 1 | V3 |
| ACBR31  | wt     | wt  | I124V/I152L | wt/wt/L151I       | 6 | yes (3°) | del30 | Raji/Argentine | Type 2 | V3 |
| ACBR32  | wt     | wt  | wt/wt       | wt/wt/wt          | 4 | no       | del30 | No classified  | Type 1 | V1 |
| ACBR33  | wt     | wt  | wt/wt       | wt/wt/wt          | 5 | no       | wt    | Mediterranean  | Type 1 | V1 |
| ACBR34  | wt     | wt  | wt/wt       | wt/wt/L151I       | 4 | no       | wt    | Mediterranean  | Type 1 | V1 |
| ACBR35  | wt     | C>T | wt/wt       | F144I/D150A/L151I | 4 | no       | del30 | No classified  | Type 2 | V3 |
| ACBR36  | wt     | wt  | wt/wt       | wt/wt/wt          | 3 | no       | wt    | Mediterranean  | Type 1 | V1 |
| ACBR37  | wt     | wt  | wt/wt       | wt/wt/L151I       | 4 | no       | wt    | Mediterranean  | Type 1 | V1 |
| ACBR38  | wt     | wt  | I124V/I152L | wt/wt/L151I       | 6 | yes (4°) | del30 | Raji/Argentine | Type 1 | V1 |
| ACBR39  | wt     | wt  | wt/wt       | wt/wt/L151I       | 4 | no       | wt    | Mediterranean  | Type 1 | V1 |
| ACBR40  | wt     | wt  | wt/wt       | wt/wt/L151I       | 6 | no       | wt    | Mediterranean  | Type 1 | V1 |
| ACBR41  | wt     | wt  | I124V/I152L | wt/wt/L151I       | 5 | yes (3°) | del30 | Raji/Argentine | Type 1 | V1 |
| ACBR42  | wt     | wt  | wt/wt       | wt/wt/L151I       | 5 | no       | wt    | Mediterranean  | Type 1 | V1 |
| ACBR43  | wt     | wt  | wt/wt       | wt/wt/L151I       | 5 | no       | wt    | Mediterranean  | Type 1 | V1 |
| ACBR44  | wt     | wt  | wt/wt       | wt/wt/wt          | 5 | yes (2°) | wt    | B95-8          | Type 2 | V3 |
| ACBR45  | wt     | wt  | I124V/I152L | wt/wt/L151I       | 5 | yes (2°) | wt    | Raji/Argentine | Type 1 | V3 |
| RLHBR01 | wt     | wt  | wt/wt       | wt/wt/wt          | 5 | no       | del30 | No classified  | Type 1 | NA |

|         |    |     |             |                   |   |          |       |                |        |    |
|---------|----|-----|-------------|-------------------|---|----------|-------|----------------|--------|----|
| RLHBR02 | wt | wt  | wt/wt       | wt/wt/L151I       | 4 | no       | wt    | Mediterranean  | Type 1 | NA |
| RLHBR03 | wt | wt  | wt/wt       | wt/wt/L151I       | 4 | no       | wt    | Mediterranean  | Type 1 | NA |
| RLHBR04 | wt | wt  | wt/wt       | wt/wt/wt          | 4 | no       | wt    | Mediterranean  | Type 1 | V1 |
| BLBR01  | wt | wt  | wt/wt       | wt/wt/wt          | 3 | no       | wt    | Mediterranean  | Type 1 | V1 |
| BLBR02  | wt | wt  | wt/wt       | wt/wt/L151I       | 5 | no       | wt    | Mediterranean  | Type 1 | V1 |
| BLBR03  | wt | wt  | wt/wt       | wt/wt/wt          | 4 | no       | wt    | Mediterranean  | Type 1 | V1 |
| BLBR04  | wt | wt  | I124V/I152L | wt/wt/L151I       | 4 | yes (3°) | del30 | Raji/Argentine | Type 1 | V1 |
| BLBR05  | wt | wt  | I124V/I152L | wt/wt/L151I       | 5 | yes (4°) | del30 | Raji/Argentine | Type 1 | V1 |
| BLBR06  | wt | wt  | I124V/I152L | wt/wt/L151I       | 4 | no       | wt    | Raji/Argentine | Type 1 | V1 |
| BLBR07  | wt | wt  | wt/wt       | wt/wt/L151I       | 6 | yes (5°) | del30 | No classified  | Type 1 | NA |
| CHLBR01 | wt | wt  | wt/wt       | wt/wt/wt          | 4 | no       | del30 | Mediterranean  | Type 1 | V1 |
| CHLBR02 | wt | wt  | wt/wt       | wt/wt/wt          | 5 | yes (4°) | wt    | B95-8          | Type 1 | V1 |
| CHLBR03 | wt | wt  | I124V/I152L | wt/wt/L151I       | 5 | yes (4°) | del30 | Raji/Argentine | Type 1 | V1 |
| CHLBR04 | wt | wt  | I124V/I152L | wt/wt/L151I       | 5 | yes (4°) | del30 | Raji/Argentine | Type 1 | V1 |
| CHLBR05 | wt | wt  | wt/wt       | wt/wt/L151I       | 4 | no       | wt    | Mediterranean  | Type 1 | V1 |
| CHLBR06 | wt | wt  | wt/wt       | wt/wt/wt          | 4 | yes (3°) | wt    | B95-8          | Type 2 | V3 |
| CHLBR07 | wt | wt  | wt/wt       | wt/wt/L151I       | 6 | yes (5°) | wt    | Mediterranean  | Type 1 | NA |
| CHLBR08 | wt | wt  | I124V/I152L | wt/wt/L151I       | 5 | yes (4°) | del30 | Raji/Argentine | Type 1 | V3 |
| CHLBR09 | wt | wt  | wt/wt       | wt/wt/wt          | 4 | no       | wt    | Mediterranean  | Type 1 | V1 |
| CHLBR10 | wt | wt  | I124V/I152L | wt/wt/L151I       | 4 | yes (3°) | wt    | Raji/Argentine | Type 1 | V3 |
| CHLBR11 | wt | wt  | wt/I152L    | wt/wt/L151I       | 4 | yes (3°) | wt    | No classified  | Type 1 | NA |
| CHLBR12 | wt | wt  | I124V/I152L | wt/wt/L151I       | 5 | yes (4°) | del30 | Raji/Argentine | Type 1 | NA |
| CHLBR13 | wt | wt  | wt/wt       | wt/wt/wt          | 4 | yes (3°) | wt    | B95-8          | Type 1 | V1 |
| CHLBR14 | NA | wt  | I124V/I152L | wt/wt/L151I       | 5 | yes (4°) | del30 | Raji/Argentine | Type 1 | V1 |
| CHLBR15 | wt | wt  | I124V/I152L | wt/wt/L151I       | 4 | no       | wt    | Raji/Argentine | Type 1 | V1 |
| CHLBR16 | wt | C>T | wt/wt       | F144I/D150A/L151I | 5 | no       | del30 | No classified  | Type 2 | NA |
| CHLBR17 | wt | C>T | wt/wt       | F144I/D150A/L151I | 2 | no       | del30 | No classified  | Type 1 | V1 |

|         |    |    |             |             |   |          |       |                |        |    |
|---------|----|----|-------------|-------------|---|----------|-------|----------------|--------|----|
| CHLBR18 | wt | wt | I124V/I152L | wt/wt/L151I | 6 | yes (4°) | del30 | Raji/Argentina | Type 2 | V3 |
| CHLBR19 | wt | wt | I124V/I152L | wt/wt/L151I | 4 | yes (3°) | wt    | Raji/Argentina | Type 1 | V3 |
| CHLBR20 | wt | wt | I124V/I152L | wt/wt/L151I | 5 | yes (4°) | del30 | Raji/Argentina | Type 1 | V1 |
| CHLBR21 | wt | wt | I124V/I152L | wt/wt/L151I | 5 | yes (4°) | del30 | Raji/Argentina | Type 1 | V1 |
| CHLBR22 | wt | wt | I124V/I152L | wt/wt/L151I | 4 | no       | wt    | Raji/Argentina | Type 1 | V1 |
| CHLBR23 | wt | wt | wt/wt       | wt/wt/L151I | 4 | yes (3°) | wt    | Mediterranean  | Type 1 | V1 |
| CHLBR24 | wt | wt | wt/wt       | wt/wt/L151I | 4 | yes (3°) | wt    | Mediterranean  | Type 1 | V1 |
| CHLBR25 | wt | wt | wt/wt       | wt/wt/wt    | 4 | yes (3°) | wt    | Mediterranean  | Type 1 | NA |
| CHLBR26 | wt | wt | I124V/I152L | wt/wt/L151I | 5 | yes (4°) | del30 | Raji/Argentina | Type 1 | NA |

LMP-1: latent membrane protein 1; *Xho*I: endonuclease type 2, from *Xanthomonas holcicola*; wt: wildtype; C: cytosine; T: thymine; I: isoleucine; V: valine; L: leucine; F: phenylalanine; D: aspartic acid; A: alanine; rep: repetition; bp: base pairs; ins15: 15 bp insert; del30: 30 bp deletion; del69: 69 bp deletion; NA: Not available.

**Table S4 – Relationship of polymorphisms with clades and clinical outcomes investigated**

| Polymorphisms                           | LMP-1 clade |           |         |         |               | <i>p</i> - <i>value</i> |                  | Clinical outcomes |           | <i>p</i> - <i>value</i> |
|-----------------------------------------|-------------|-----------|---------|---------|---------------|-------------------------|------------------|-------------------|-----------|-------------------------|
|                                         | N (%)       |           |         |         |               |                         |                  | N (%)             |           |                         |
|                                         | Med         | Raji      | B95-8   | Asian   | No classified | all                     | Med x Raji       | ABC               | MC        |                         |
| LMP-1 N-terminus polymorphisms          |             |           |         |         |               |                         |                  |                   |           |                         |
| <i>Xho</i> I restriction site (c↓tcgag) | 33 (100)    | 31 (100)  | 5 (100) | 0 (0.0) | 11 (100)      | <i>p</i> <0.0001        | <i>p</i> *       | 48 (98.0)         | 32 (100)  | <i>p</i> =1             |
| <i>Xho</i> I restriction site lost      | 0 (0.0)     | 0 (0.0)   | 0 (0.0) | 1 (100) | 0 (0.0)       |                         |                  | 1 (2.0)           | 0 (0.0)   |                         |
| LMP-1 Transmembrane polymorphisms       |             |           |         |         |               |                         |                  |                   |           |                         |
| Position 169055 wt                      | 33 (100)    | 32 (100)  | 5 (100) | 1 (100) | 6 (54.5)      | <i>p</i> <0.0001        | <i>p</i> *       | 46 (93.9)         | 31 (93.9) | <i>p</i> =1             |
| Position 169055 C>T                     | 0 (0.0)     | 0 (0.0)   | 0 (0.0) | 0 (0.0) | 5 (45.5)      |                         |                  | 3 (6.1)           | 2 (6.1)   |                         |
| wt/wt                                   | 33 (100)    | 2 (6.2)   | 5 (100) | 1 (100) | 10 (90.9)     | <i>p</i> <0.0001        | <i>p</i> <0.0001 | 35 (71.4)         | 16 (48.5) | <i>p</i> =0.071         |
| wt/I152L                                | 0 (0.0)     | 0 (0.0)   | 0 (0.0) | 0 (0.0) | 1 (16.7)      |                         |                  | 0 (0.0)           | 1 (3.0)   |                         |
| I124V/I152L                             | 0 (0.0)     | 30 (93.8) | 0 (0.0) | 0 (0.0) | 0 (0.0)       |                         |                  | 14 (28.6)         | 16 (48.5) |                         |
| wt/wt/wt                                | 17 (51.5)   | 0 (0.0)   | 5 (100) | 0 (0.0) | 4 (36.4)      | <i>p</i> <0.0001        | <i>p</i> <0.0001 | 18 (36.7)         | 8 (24.2)  | <i>p</i> =0.5           |
| wt/wt/L151I                             | 16 (48.5)   | 32 (100)  | 0 (0.0) | 0 (0.0) | 2 (18.2)      |                         |                  | 27 (55.1)         | 23 (69.7) |                         |
| F144I/wt/L151I                          | 0 (0.0)     | 0 (0.0)   | 0 (0.0) | 1 (100) | 0 (0.0)       |                         |                  | 1 (2.0)           | 0 (0.0)   |                         |
| F144I/D150A/L151I                       | 0 (0.0)     | 0 (0.0)   | 0 (0.0) | 0 (0.0) | 5 (45.5)      |                         |                  | 3 (6.1)           | 2 (6.1)   |                         |

# LMP-1 C-terminus polymorphisms

## 33 bp repetition

|    |           |           |          |         |          |               |                |           |           |               |
|----|-----------|-----------|----------|---------|----------|---------------|----------------|-----------|-----------|---------------|
| x1 | 1 (3.0)   | 0 (0.0)   | 0 (0.0)  | 0 (0.0) | 0 (0.0)  | <i>p</i> =0.2 | <i>p</i> =0.01 | 1 (3.0)   | 0 (0.0)   | <i>p</i> =0.5 |
| x2 | 0 (0.0)   | 0 (0.0)   | 0 (0.0)  | 0 (0.0) | 0 (0.0)  |               |                | 0 (0.0)   | 1 (3.0)   |               |
| x3 | 4 (12.1)  | 0 (0.0)   | 0 (0.0)  | 0 (0.0) | 0 (0.0)  |               |                | 4 (12.1)  | 1 (3.0)   |               |
| x4 | 16 (48.5) | 9 (28.1)  | 3 (60.0) | 0 (0.0) | 4 (36.4) |               |                | 16 (48.5) | 16 (48.5) |               |
| x5 | 7 (21.2)  | 19 (59.4) | 2 (40.0) | 1 (100) | 4 (36.4) |               |                | 7 (21.2)  | 12 (36.4) |               |
| x6 | 4 (12.1)  | 4 (12.5)  | 0 (0.0)  | 0 (0.0) | 1 (9.1)  |               |                | 4 (12.1)  | 3 (9.1)   |               |
| x7 | 0 (0.0)   | 0 (0.0)   | 0 (0.0)  | 0 (0.0) | 1 (9.1)  |               |                | 0 (0.0)   | 0 (0.0)   |               |
| x8 | 1 (3.0)   | 0 (0.0)   | 0 (0.0)  | 0 (0.0) | 0 (0.0)  |               |                | 1 (3.0)   | 0 (0.0)   |               |

|                  |           |           |         |         |          |                  |                  |           |           |                 |
|------------------|-----------|-----------|---------|---------|----------|------------------|------------------|-----------|-----------|-----------------|
| Without ins15 bp | 29 (87.9) | 4 (12.5)  | 0 (0.0) | 1 (100) | 9 (81.8) | <i>p</i> <0.0001 | <i>p</i> <0.0001 | 32 (65.3) | 11 (33.3) | <i>p</i> =0.007 |
| Ins15 bp         | 4 (12.1)  | 28 (87.5) | 5 (100) | 0 (0.0) | 2 (18.2) |                  |                  | 17 (34.7) | 22 (66.7) |                 |

## Ins15 position

|                     |          |           |          |         |          |                 |                 |           |           |               |
|---------------------|----------|-----------|----------|---------|----------|-----------------|-----------------|-----------|-----------|---------------|
| 2° 33 bp repetition | 0 (0.0)  | 1 (3.6)   | 1 (20.0) | 0 (0.0) | 0 (0.0)  | <i>p</i> =0.003 | <i>p</i> =0.005 | 2 (11.8)  | 0 (0.0)   | <i>p</i> =0.2 |
| 3° 33 bp repetition | 3 (75.0) | 7 (25.0)  | 3 (60.0) | 0 (0.0) | 1 (50.0) |                 |                 | 5 (29.4)  | 9 (40.9)  |               |
| 4° 33 bp repetition | 0 (0.0)  | 20 (71.4) | 1 (20.0) | 0 (0.0) | 0 (0.0)  |                 |                 | 10 (58.8) | 11 (50.0) |               |
| 5° 33 bp repetition | 1 (25.0) | 0 (0.0)   | 0 (0.0)  | 0 (0.0) | 1 (50.0) |                 |                 | 0 (0.0)   | 2 (9.1)   |               |

|    |           |          |         |         |         |                  |                  |           |           |               |
|----|-----------|----------|---------|---------|---------|------------------|------------------|-----------|-----------|---------------|
| wt | 28 (84.8) | 9 (28.1) | 5 (100) | 1 (100) | 1 (9.1) | <i>p</i> <0.0001 | <i>p</i> <0.0001 | 26 (53.1) | 18 (54.5) | <i>p</i> =0.3 |
|----|-----------|----------|---------|---------|---------|------------------|------------------|-----------|-----------|---------------|

|       |         |           |         |         |           |  |           |           |
|-------|---------|-----------|---------|---------|-----------|--|-----------|-----------|
| del30 | 2 (6.1) | 23 (71.9) | 0 (0.0) | 0 (0.0) | 10 (90.9) |  | 20 (40.8) | 15 (45.5) |
| del69 | 3 (9.1) | 0 (0.0)   | 0 (0.0) | 0 (0.0) | 0 (0.0)   |  | 3 (6.1)   | 0 (0.0)   |

### Haplotype Type 1 + V3

|     |          |           |         |         |         |           |           |           |           |         |
|-----|----------|-----------|---------|---------|---------|-----------|-----------|-----------|-----------|---------|
| yes | 0 (0.0)  | 5 (19.2)  | 0 (0.0) | 1 (100) | 0 (0.0) | $p=0.003$ | $p=0.051$ | 3 (8.1)   | 3 (11.5)  | $p=0.6$ |
| no  | 25 (100) | 21 (80.8) | 5 (100) | 0 (0.0) | 6 (100) |           |           | 34 (91.9) | 23 (88.5) |         |

---

LMP-1: latent membrane protein 1; N: number; Med clade: Mediterranean; Raji clade: Raji/Argentine; Asian clade: China1 and China2; ABC: Asymptomatic carrier and benign cases; MC: malignant cases; *Xho*I: endonuclease type 2, from *Xanthomonas holcicola*; wt: wildtype; C: cytosine; T: thymine; I: isoleucine; V: valine; L: leucine; F: phenylalanine; D: aspartic acid; A: alanine; rep: repetition; bp: base pairs; ins15: 15 bp insert; del30: 30 bp deletion; del69: 69 bp deletion;  $p^*$ : the variable is constant



**Table S5 – Global LMP-1 phylogenetic classification**

| LMP-1 major clades | Support (aLRT) | Global totality N (%) | LMP-1 minor clades            | Support (aLRT) | N (%)           |               |               |         |         |         |         |
|--------------------|----------------|-----------------------|-------------------------------|----------------|-----------------|---------------|---------------|---------|---------|---------|---------|
|                    |                |                       |                               |                | Global totality | North America | South America | Europe  | Africa  | Asia    | Oceania |
| Major clade I      | 0.96           | 316 (67)              | Mediterranean                 | 0.94           | 111 (24)        | 2 (5)         | 44 (28)       | 24 (44) | 28 (58) | 9 (6)   | 4 (20)  |
|                    |                |                       | Raji/Argentina                | 0.99           | 91 (19)         | 5 (12)        | 72 (45)       | 5 (9)   | 8 (17)  | 0       | 1 (5)   |
|                    |                |                       | B95-8                         | 0.93           | 43 (9)          | 13 (32)       | 11 (7)        | 9 (16)  | 2 (4)   | 5 (4)   | 3 (15)  |
|                    |                |                       | America/Europe                | 0.75           | 28 (6)          | 10 (24)       | 3 (2)         | 12 (22) | 0       | 0       | 3 (15)  |
|                    |                |                       | Major clade I not classified  | NA             | 37 (8)          | 3 (8)         | 13 (8)        | 3 (5)   | 9 (19)  | 9 (6)   | 0       |
| Major clade II     | 0.96           | 156 (33)              | Asian I                       | 0.83           | 101 (22)        | 5 (12)        | 1 (1)         | 0       | 0       | 95 (67) | 0       |
|                    |                |                       | Asian II                      | 0.95           | 45 (10)         | 2 (5)         | 12 (7)        | 1 (2)   | 1 (2)   | 20 (14) | 9 (45)  |
|                    |                |                       | Major clade II not classified | NA             | 8 (2)           | 1 (2)         | 2 (2)         | 1 (2)   | 0       | 4 (3)   | 0       |

LMP-1: latent membrane protein 1; N: number of sequences; aLRT: Average Likelihood Ratio test; NA: Not available;

**Table S6 – Best fit molecular clock and discrete phylogeographic model for the EBV LMP-1 Raji/Argentine clade dataset**

| Path Sampling           | UCLD    | <u>Strict</u>  | Log BF<br>(Strict vs UCLD) |
|-------------------------|---------|----------------|----------------------------|
| <u>Asymmetric</u>       | -3527,4 | <b>-3508,7</b> | 18,6                       |
| Symmetric               | -3534,3 | -3511,3        | 23,0                       |
| Log BF<br>(Asym vs Sym) | 6,9     | 2,6            |                            |
|                         |         |                |                            |
| Stepping-Stone          | UCLD    | <u>Strict</u>  | Log BF<br>(Strict vs UCLD) |
| <u>Asymmetric</u>       | -3528,9 | <b>-3509,0</b> | 19,9                       |
| Symmetric               | -3535,7 | -3511,5        | 24,2                       |
| Log BF<br>(Asym vs Sym) | 6,8     | 2,5            |                            |

Log marginal likelihood (ML) estimates for strict clock *vs* uncorrelated relaxed clock with a lognormal distribution (UCLD) and Symmetric *vs* Asymmetric discrete phylogeographic models obtained using the path sampling (PS) and stepping-stone sampling (SS) methods. The Log Bayes factor (BF) is the difference of the Log ML between of alternative (H1) and null (H0) models (H1/H0). Log positive BF's values indicates that model H1 is more strongly supported by the data than model H0, while negative values indicate that BF is in favor of the model H0. Each model was systematically compared, and best PS and SS values were highlighted in bold while the best fit model was underlined.

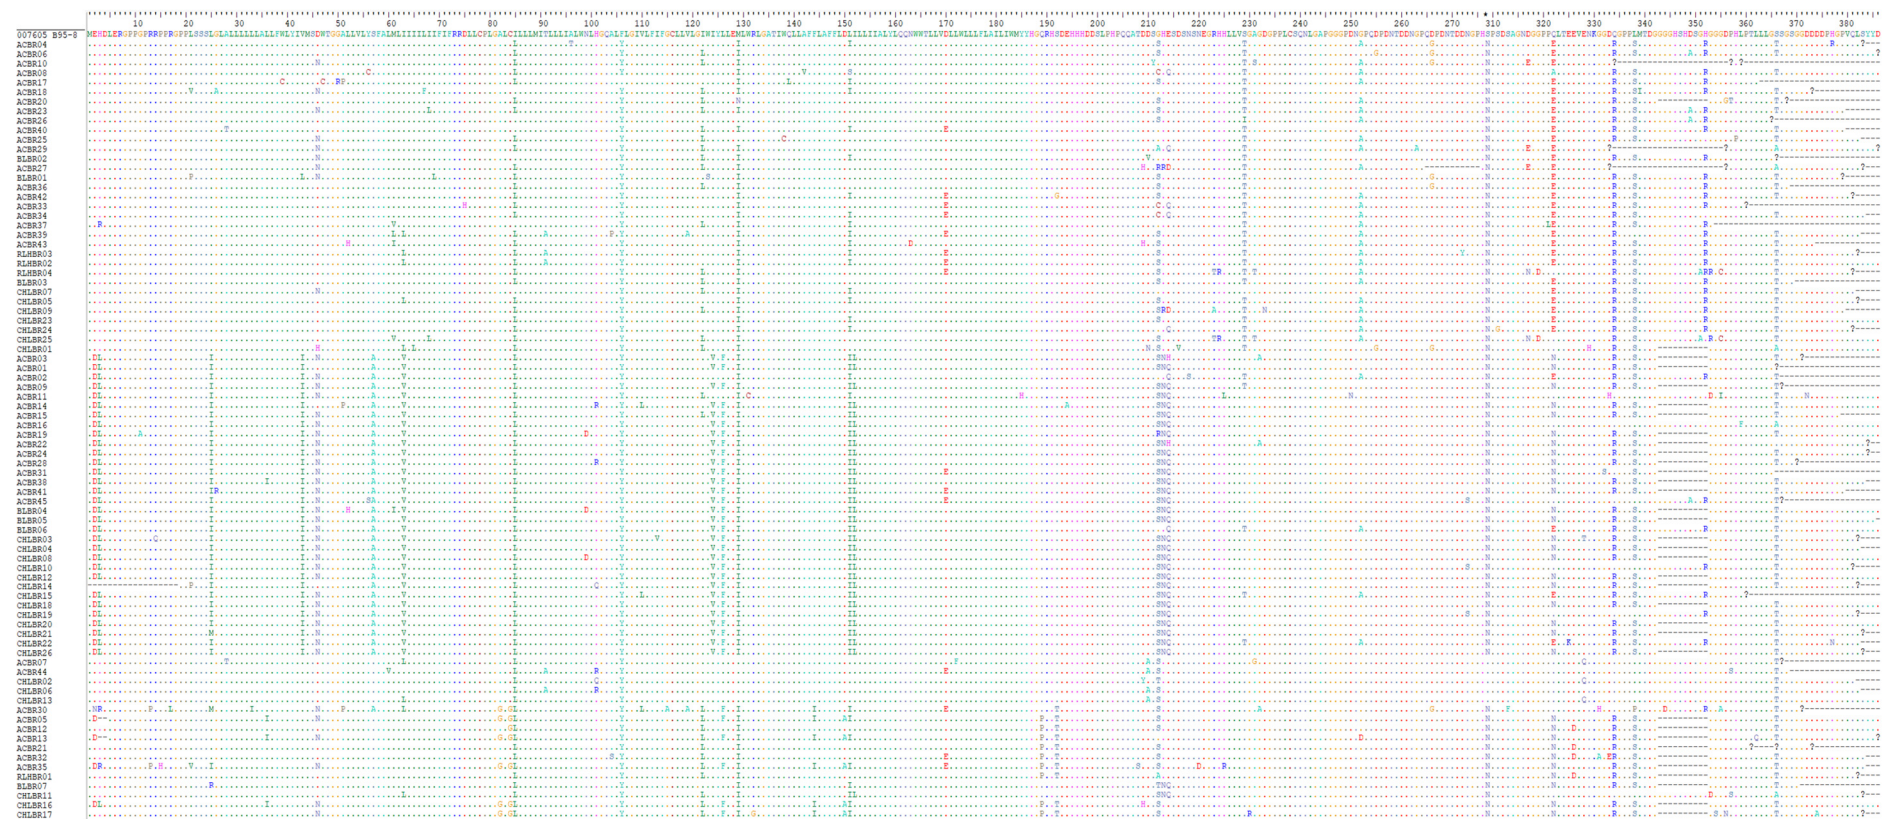

**Figure S1 – The overall LMP-1 amino acid (aa) sequence alignment from the sequences generated in this present study (n=82).** The alignment order starts with the reference prototype (Genbank number NC\_007605) and follows the order of sequences belonging to the Mediterranean clades, followed by those belonging to the Raji/Argentine, B95-8 and Asian II clades, finally the last aligned sequences are those that have not clearly grouped into a specific clade (unclassified). The asterisk represents the cut-off area of the repetitive regions which were not used for the genetic classification of the clades established in this work (nucleotide position -168507 to -168411 from EBV reference prototype genome or 276 to 307 aa in this figure).

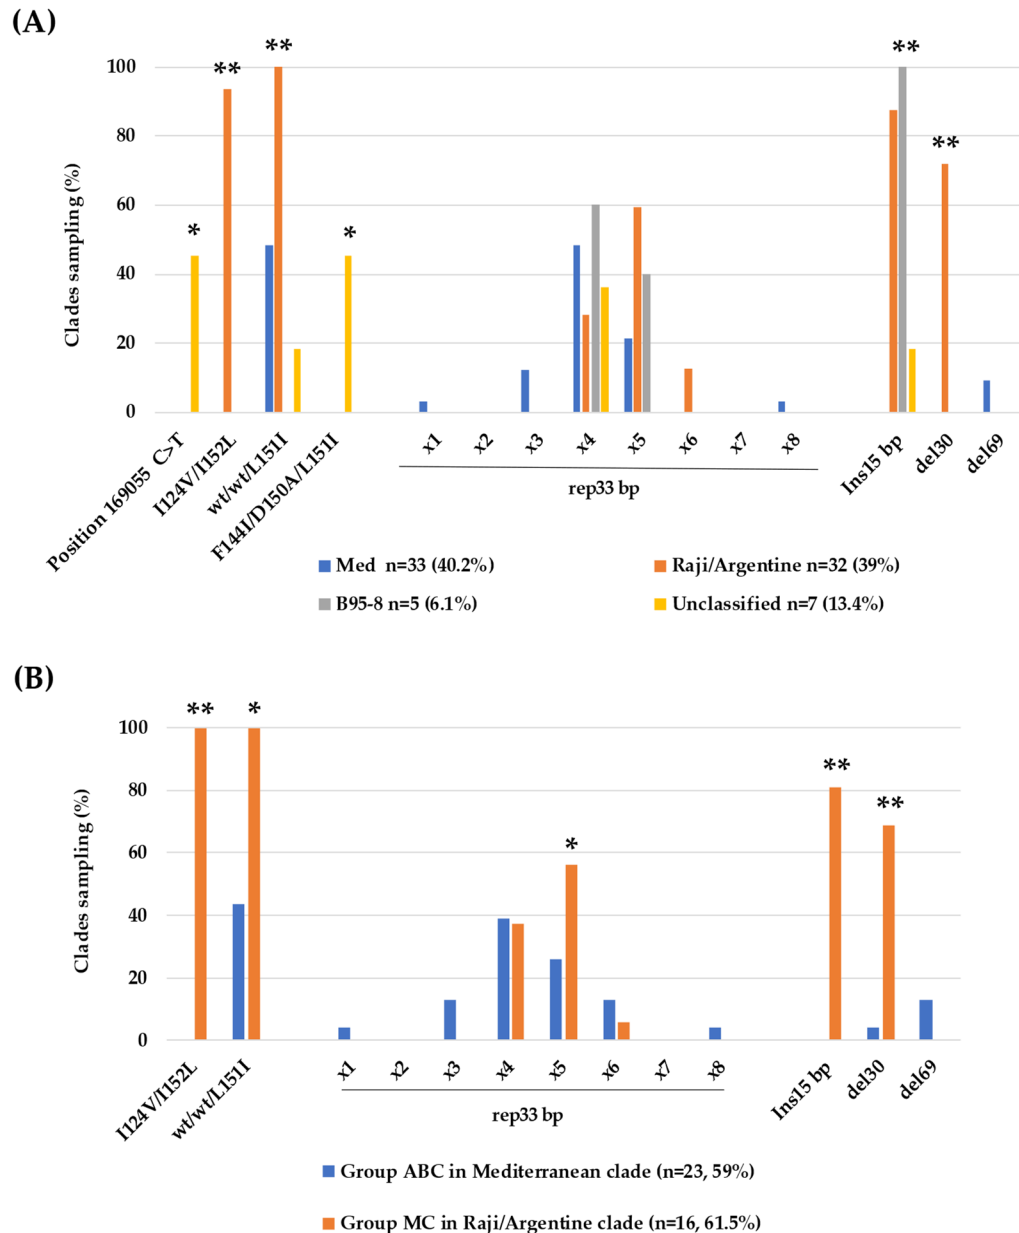

**Figure S2 – LMP-1 polymorphisms in the main clades defined in this study.** (A) Polymorphisms details in the three main clades defined in this study. The percentage in the subtitle is related to all sequences in this work (n=82), and on the y axis it indicates the sample percentage of each clades. The symbol \* indicate  $p < 0.05$  related to all clades and \*\*  $p < 0.05$  when evaluated Mediterranean clade *versus* Raji/Argentine. (B) The relationship of polymorphisms and distinct clinical outcome in the two main LMP-1 lineages circulating in Brazil, thus, the percentage is related to each clinical group that clustered in both clades (ABC, n=39 and MC, n=26). The symbol \* indicate  $p < 0.05$  and \*\*  $p < 0.001$ . Wt: wildtype; I: isoleucine; V: valine; L: leucine; bp: base pairs; rep33 bp: repeat 33 bp; Ins15 bp: 15 bp insert; del30: 30 bp deletion; del69: 69 base pair deletion.
